# Supplementary material
Source: Springer Nature journal article supplement (https://www.springermedizin.de/resource/supplementary/12889_2010_2321_MOESM3_ESM.pdf/9485376)
Supplement: MOESM3 [file 9485376]

Assessed for eligibility (131 kindergartens=clusters)

Stratification

**Rural area<sup>1</sup>** of Wuerzburg and Kitzingen  
86 invited clusters

**Urban area<sup>2</sup>** of Wuerzburg and Kitzingen  
45 invited clusters

Excluded (55 clusters)  
- Refused to participate (55 clusters)

Excluded (35 clusters)  
- Refused to participate (35 clusters)

Eligible to participate:  
31 clusters  
782 children  
(Mean cluster size=25 children, min=9, max=49)

Eligible to participate:  
10 clusters  
211 children  
(Mean cluster size=21 children, min=13, max=32)

Written informed consent 603 children

Written informed consent 161 children

Excluded (36 children)  
- Health reasons (n=2)  
- Not meeting inclusion criteria of age (n=10)  
- Refused to participate (n=24)

Excluded (19 children)  
- Not meeting inclusion criteria of age (n=10)  
- Refused to participate (n=9)

31 clusters  
567 children  
(Mean cluster size=18 children, min=6, max=36)

10 clusters  
142 children  
(Mean cluster size=14 children, min=7, max=22)

**Intervention group**  
16 clusters  
280 children  
(Mean cluster size=17 children,  
min=6, max=36)

**Control group**  
15 clusters  
287 children  
(Mean cluster size=19 children,  
min=7, max=30)

**Intervention group**  
5 clusters  
88 children  
(Mean cluster size=17 children,  
min=14, max=22)

**Control group**  
5 clusters  
54 children  
(Mean cluster size=10 children,  
min=7, max=13)
